# Supplementary material for: Retrosynformer: planning multi-step chemical synthesis routes via a decision transformer
Source: Royal Society of Chemistry journal article supplement (doi:10.1039/d5dd00153f), 2025-11-18
Supplement: d5dd00153f1.pdf [file d5dd00153f1.pdf]

## Supplementary Information

**RetroSynFormer:** Planning multi-step chemical synthesis routes via a Decision Transformer

**Authors:** Emma Granqvist, Rocío Mercado, and Samuel Genheden

### A Optimization and Reward Settings

In Tables S1-S2 we describe the search space for the DT and reward parameters, which were optimized using Optuna. In Algorithm 1, we describe the reward function in detail. In Table S3 we provide details on the reward parameters for the alternative reward functions described in Table S1.

Table S1: Search space for the DT parameters and the optimal values used for training the DT model.

| Model parameter     | Search range                                        | Optimal value |
|---------------------|-----------------------------------------------------|---------------|
| activation_function | {relu, silu, gelu, tanh, gelu_new}                  | relu          |
| action_tanh         | {true, false}                                       | false         |
| attn_pdrop          | $\{0.01x \mid x \in \mathbb{Z}, 1 \leq x \leq 20\}$ | 0.02          |
| embd_pdrop          | $\{0.01x \mid x \in \mathbb{Z}, 1 \leq x \leq 20\}$ | 0.2           |
| hidden_size         | {32, 64, 128, 256, 512, 1024, 2048}                 | 256           |
| n_heads             | $\{2x \mid x \in \mathbb{Z}, 0 \leq x \leq 32\}$    | 4             |
| n_layers            | $\{2x \mid x \in \mathbb{Z}, 0 \leq x \leq 32\}$    | 26            |
| resid_pdrop         | $\{0.01x \mid x \in \mathbb{Z}, 1 \leq x \leq 20\}$ | 0.08          |
| Settings            |                                                     | Value         |
| # epochs            |                                                     | 300           |
| Maximizing          |                                                     | Success rate  |

**Algorithm S1** Pseudo code explaining how the RetroSynFormer reward function works.

```

 $action_t \leftarrow \text{retrosynformer.predict}(\text{states}, \text{rewards}, \text{actions})$ 
 $state_{t+1} \leftarrow \text{env.step}(action_t)$ 
 $reward_{t+1} \leftarrow 0$ 

for  $s$  in  $state_{t+1}$  do
     $reward_{t+1} \leftarrow reward_{t+1} + reward\_factor(s) \times scale\_depth(s) \times depth(s)$ 
end for
 $reward_{t+1} \leftarrow \frac{reward_{t+1}}{\text{len}(state_{t+1})}$ 

```

where

$$reward\_factor \leftarrow \begin{cases} 0, & \text{if } s \text{ is building block} \\ -2, & \text{if } s \text{ is intermediate} \\ 2, & \text{if } s \text{ is dead end} \end{cases}$$

and

$$scale\_depth \leftarrow \begin{cases} 2, & \text{if } s \text{ is building block} \\ 1, & \text{if } s \text{ is intermediate} \\ -2, & \text{if } s \text{ is dead end} \end{cases}$$

Table S2: Search space for the reward parameters and the optimal values used for training the DT model.

| Hyperparameters                 | Search range                                      | Optimal value |
|---------------------------------|---------------------------------------------------|---------------|
| Building block reward           | {0, 0.001, 0.01, 0.1, 0.25, 0.5, 1, 2, 4}         | 0             |
| Building block scale with depth | {0, 0.01, 0.1, 0.5, 1, 2}                         | 2             |
| Intermediate reward             | {0, -0.001, -0.01, -0.1, -0.25, -0.5, -1, -2, -4} | -2            |
| Intermediate scale with depth   | {0, 0.01, 0.1, 0.5, 1, 2}                         | 1             |
| Dead-end reward                 | {0, -0.001, -0.01, -0.1, -0.25, -0.5, -1, -2, -4} | -2            |
| Dead-end depth                  | {0, 0.01, 0.1, 0.5, 1, 2}                         | 2             |
| Settings                        |                                                   | Value         |
| # epochs                        |                                                   | 100           |
| Maximizing                      |                                                   | Success rate  |

Table S3: The reward parameters for alternative rewards.

| Label                                | Building block |       | Intermediate |       | Dead End |       |
|--------------------------------------|----------------|-------|--------------|-------|----------|-------|
|                                      | Reward         | Scale | Reward       | Scale | Reward   | Scale |
| Default                              | 0              | -2    | 1            | -2    | -2       | 2     |
| Increasing Building Block Reward     | 2              | -2    | 1            | -2    | -2       | 2     |
| Decreasing Building Block Reward     | -2             | -2    | 1            | -2    | -2       | 2     |
| Remove Scaling Building Block Reward | 2              | 0     | 1            | -2    | -2       | 2     |
| Flipping Sign Intermediate Score     | 0              | -2    | 1            | 2     | -2       | 2     |
| Remove Scaling Intermediate          | 0              | -2    | 0            | -2    | -2       | 2     |
| Flipping Sign Dead End Score         | 0              | -2    | 1            | -2    | 2        | 2     |
| Remove Scaling Dead End              | 0              | -2    | 1            | -2    | -2       | 0     |

## B Complimentary Results

In Figure S1 we describe the route characteristics for the routes generated by the RetroSynFormer and AiZynthFinder on the N5 set. In Figures S2 and S3 we present histograms for the most common reaction templates in the N1 and N5 sets, respectively. Finally, in Table S4 we compare the performance of the RetroSynFormer and AiZynthFinder on the targets that are shared across the N1 and N5 test sets, respectively.

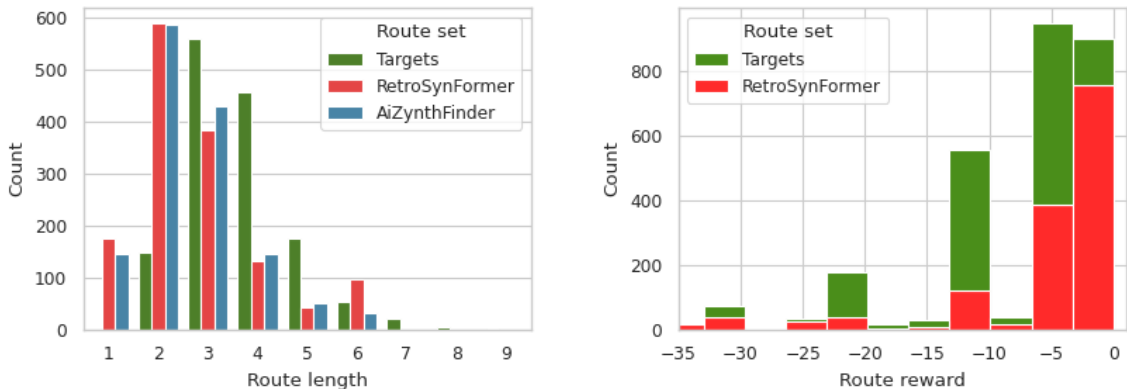

(a) Histograms of N5 route lengths, measured as the number of actions per route, for each route set. (b) Stacked bar plot showing the distribution of N5 route rewards in the target versus RetroSynFormer-predicted routes.

Figure S1: Route characteristics for routes for the N5 test set target routes compared to the RetroSynFormer and AiZynthFinder solved predictions. a) The median reward for the route length is 4 for the target routes and 2 for the RetroSynFormer and AiZynthFinder routes. b) The median reward for the route reward is -8 for the target routes and -2 for the RetroSynFormer and AiZynthFinder routes.

Table S4: Performance of retrosynthesis models for different template sets on the 232 N1 targets and 248 N5 targets that are common among across the test sets in Table 6.

| Dataset  | Model            | Test set | Success rate | Top-1 Accuracy | TED   | Avg. route length |
|----------|------------------|----------|--------------|----------------|-------|-------------------|
| Small    | RetroSynFormer50 | N1       | 0.805        | 0.098          | 6.033 | 2.609             |
|          |                  | N5       | 0.839        | 0.094          | 5.294 | 2.37              |
|          | AiZynthFinder    | N1       | 0.914        | 0.142          | 4.746 | 2.590             |
|          |                  | N5       | 0.907        | 0.093          | 6.423 | 2.902             |
| Standard | RetroSynFormer50 | N1       | 0.953        | 0.102          | 5.314 | 2.309             |
|          |                  | N5       | 0.898        | 0.052          | 6.901 | 2.397             |
|          | AiZynthFinder    | N1       | 0.935        | 0.121          | 5.031 | 2.396             |
|          |                  | N5       | 0.911        | 0.073          | 7.059 | 2.726             |
| Large    | RetroSynFormer50 | N1       | 0.958        | 0.091          | 5.499 | 2.147             |
|          |                  | N5       | 0.917        | 0.031          | 7.136 | 2.296             |
|          | AiZynthFinder    | N1       | 0.940        | 0.099          | 5.293 | 2.362             |
|          |                  | N5       | 0.927        | 0.065          | 7.262 | 2.748             |

\* RetroSynFormer results show averages over three runs. Standard deviations for all RetroSynFormer models are  $\leq 0.02$  for success rate,  $\leq 0.02$  for top-1 accuracy,  $\leq 0.15$  for TED, and  $\leq 0.05$  for route length.

## C Reaction Templates

In Table S5 we present an illustration of the most commonly occurring templates in the predicted reactions from the RetroSynFormer.

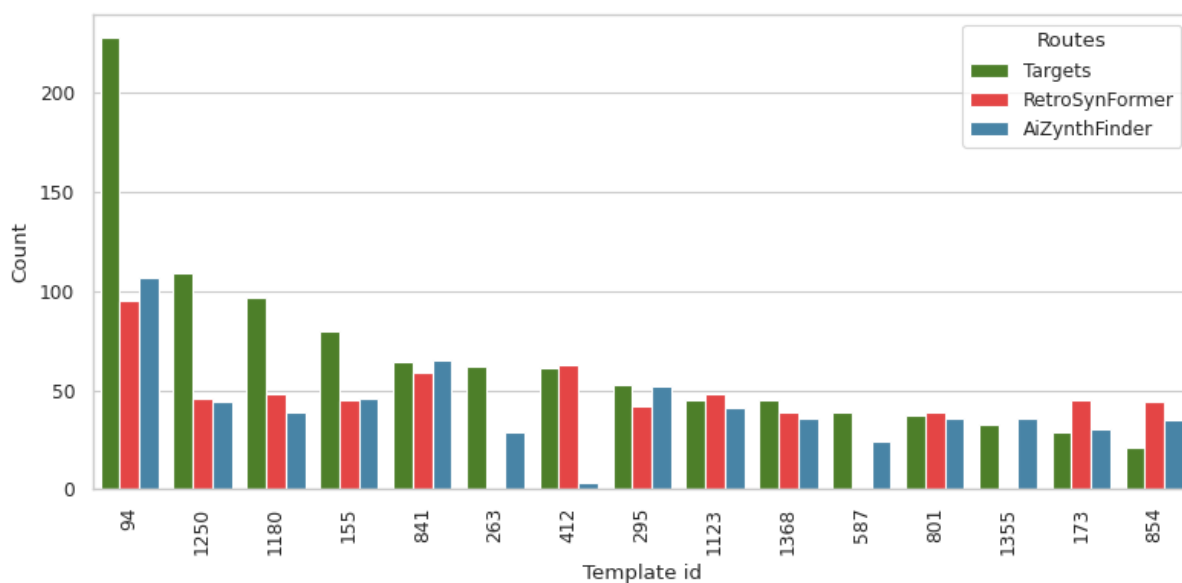

(a) Reaction template frequency distribution.

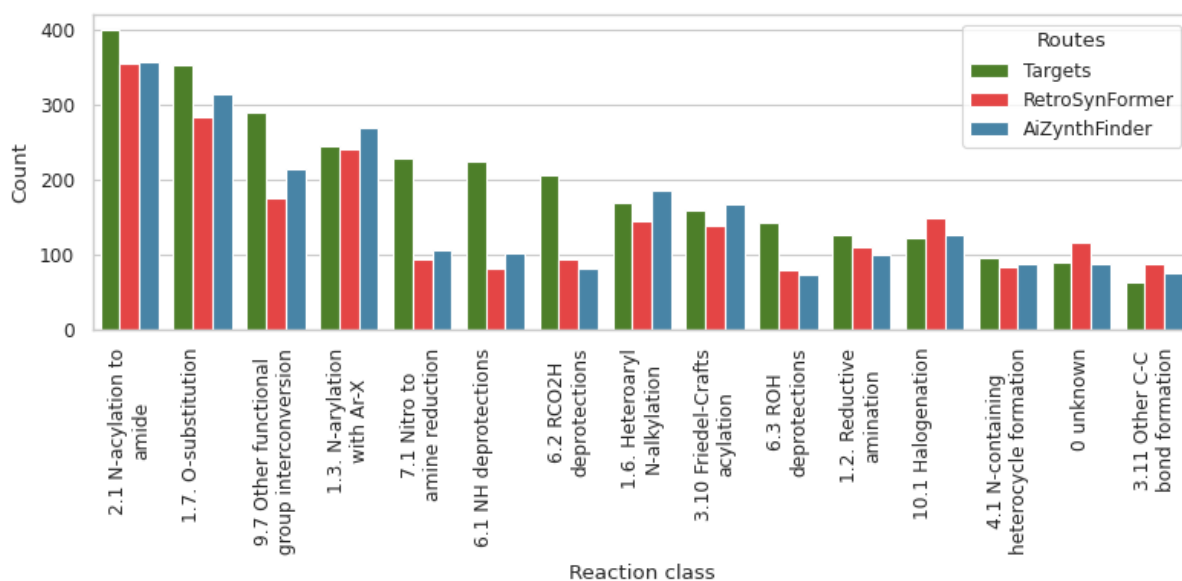

(b) Reaction classes frequency distribution.

Figure S2: Histograms of predicted reaction templates and classes for the N1 test set. a) Comparison of the counts for the 15 most common predicted templates compared to ground truth and baseline. Illustrations of the template IDs can be found in Table S5. b) Comparison of the counts for the 15 most common predicted reaction classes compared to ground truth and baseline.

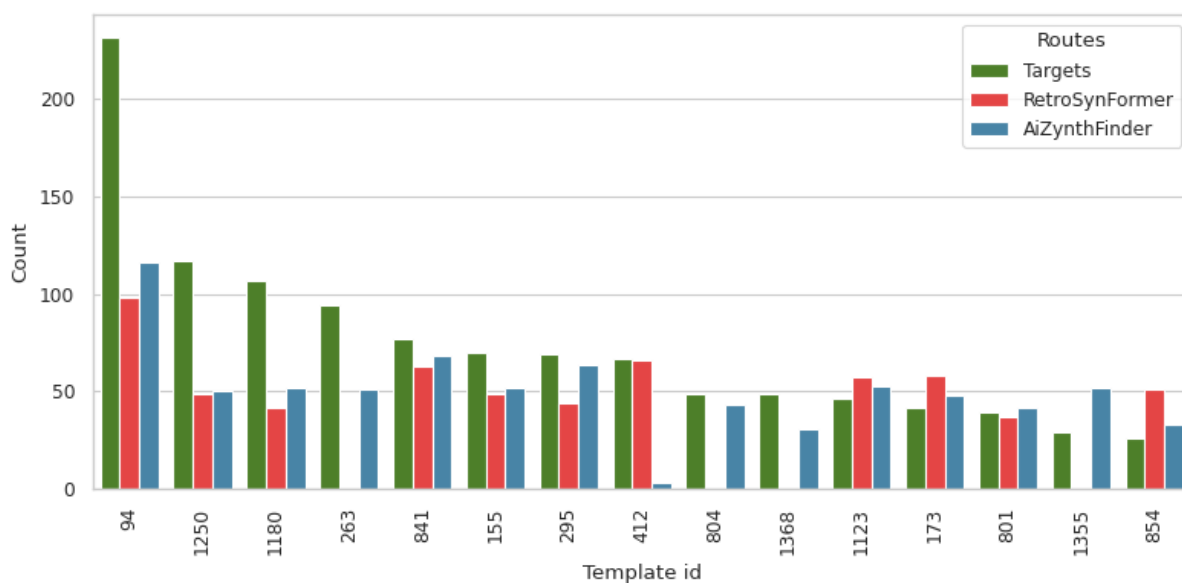

(a) Reaction template frequency distribution.

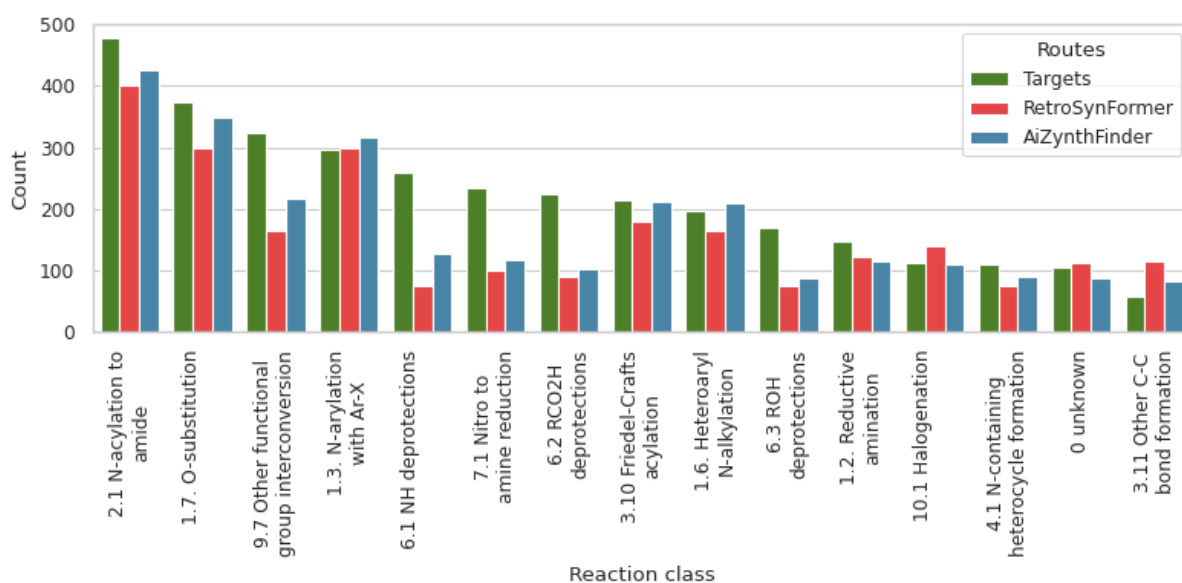

(b) Reaction classes frequency distribution.

Figure S3: Histograms of predicted reaction templates and classes for the N5 test set. a) Comparison of the counts for the 15 most common predicted templates compared to ground truth and baseline. Illustrations of the template IDs can be found in Table S5. b) Comparison of the counts for the 15 most common predicted reaction classes compared to ground truth and baseline.

Table S5: Visualization of the most common templates mentioned in Figure S2a and S3a.

| Template id | Template | Template id | Template |
|-------------|----------|-------------|----------|
| 94          |          | 841         |          |
| 155         |          | 854         |          |
| 173         |          | 1123        |          |
| 263         |          | 1180        |          |
| 412         |          | 1250        |          |
| 587         |          | 1355        |          |
| 801         |          | 1368        |          |
| 804         |          |             |          |

## D Out of Distribution Evaluation

The standard and large model was evaluated on a set of 600 randomly sampled routes extracted from the *Journal of Medicinal Chemistry* (JMC), used in [29]. The result for the evaluation can be found in Table D.

The mean pairwise Tanimoto similarity (based on 1024 Morgan Fingerprint) between the JMC targets and the molecules in the standard training set is 0.123. We observe that JMC routes are more challenging and that both RetroSynFormer and AiZynthFinder are not generalizing well to this external dataset. However we observe that the large models with additional reaction templates performs better compared to the standard model. The JMC target routes contains templates outside of the the ones used for training and we can see that the restricted template space could be a limiting factor for the model performance. In addition, the building block stock used is comprised of the leafs from the PaRoutes, these building blocks are likely not the optimal starting materials for the JMC routes and could be one reason why the number of solved routes are lower for both RetroSynFormer and AiZynthFinder.

Table S6: Performance of RetroSynFormer compared to AiZynthFinder evaluated on 600 randomly sampled routes from Journal of Medicinal Chemistry.

|                                         | Standard         |               | Large            |               |
|-----------------------------------------|------------------|---------------|------------------|---------------|
|                                         | RetroSynFormer50 | AiZynthFinder | RetroSynFormer50 | AiZynthFinder |
| Success rate (%) $\uparrow$             | 0.461            | 0.500         | 0.558            | 0.615         |
| Top-1 accuracy $\uparrow$               | 0.013            | 0.013         | 0.014            | 0.019         |
| Mean TED $\downarrow$                   | 9.018            | 10.016        | 8.87             | 9.840         |
| Mean # reactions per route $\downarrow$ | 2.787            | 2.940         | 2.616            | 2.781         |

\* RetroSynFormer results show averages over three runs using beam width 50. Standard deviation for the RetroSynFormer models is  $\leq 0.008$  for the success rate,  $\leq 0.002$  for the top-1 accuracy,  $\leq 0.03$  for the mean tree edit distance (TED), and  $\leq 0.02$  for the mean # reactions per route.
